# Supplementary material for: New amidinate complexes of indium(iii): promising CVD precursors for transparent and conductive In2O3thin films
Source: Royal Society of Chemistry journal article supplement (doi:10.1039/c7dt01280b), 2017-01-01
Supplement: c7dt01280b1.pdf [file c7dt01280b1.pdf]

Supplementary Information for the article "New amidinate complexes of indium(III): Promising CVD precursors for transparent and conductive  $\text{In}_2\text{O}_3$  thin films"

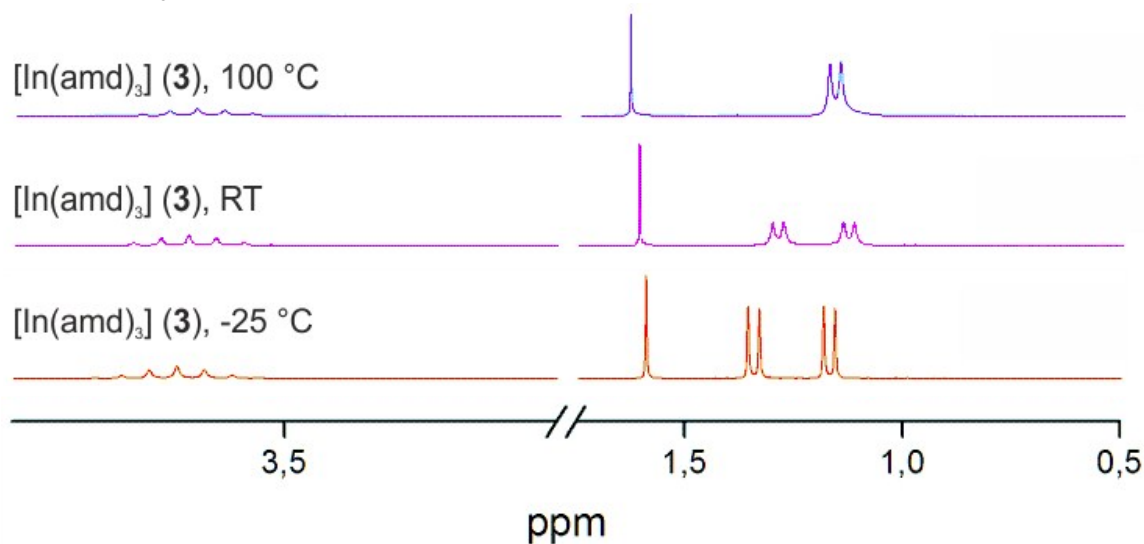

Figure S1: Temperature-dependent  $^1\text{H}$ -NMR of compound **2**,  $[\text{InMe}(\text{amd})_2]$ .

Table S1: Overview of the fragments of complexes 1, 2 and 3 observed from EI-MS analysis.

| Fragment                                       | 1          |               | 2          |               | 3          |               |
|------------------------------------------------|------------|---------------|------------|---------------|------------|---------------|
|                                                | Mass (m/z) | Rel. Int. (%) | Mass (m/z) | Rel. Int. (%) | Mass (m/z) | Rel. Int. (%) |
| $\text{M}^+$                                   | 433        | 7             | 411        | n.d.          | 538        | n.d.          |
| $\text{M}^+ - \text{CH}_3$                     | 417        | 10            | 397        | 13            | 523        | n.d.          |
| $\text{M}^+ - \text{Cl}$                       | 397        | 32            |            |               |            |               |
| $\text{M}^+ - \text{L}$                        | 291        | 22            | 271        | 100           | 396        | n.d.          |
| $\text{M}^+ - \text{L} - 2 \times \text{CH}_3$ |            |               | 241        | 18            |            |               |
| $\text{L}^+$                                   | 141        | 100           | 141        | 46            | 142        | 24            |
| cdi                                            | 127        | 3             | 127        | n.d.          | 127        | 8             |
| $\text{L} - \textit{i}\text{Pr}$               |            |               |            |               | 99         | 5             |
| $\text{L} - \text{N}^i\text{Pr}$               | 84         | 76            | 84         | 77            | 84         | 13            |
| $\text{L} - \text{N}^i\text{Pr} - \text{CH}_3$ |            |               |            |               | 70         | 15            |
| $\text{N}^i\text{Pr}^+$                        | 58         | 17            | 58         | 15            | 58         | 63            |
| $\textit{i}\text{Pr}^+$                        | 43         | 18            | 43         | 20            | 42         | 100           |
| $\text{CH}_2 - \text{CH}_3^+$                  |            |               |            |               | 28         | 25            |

$\text{M}^+$  = molecular ion.  $\text{L} = (\text{N}^i\text{Pr})_2\text{CCH}_3$ . n.d. = not detected.

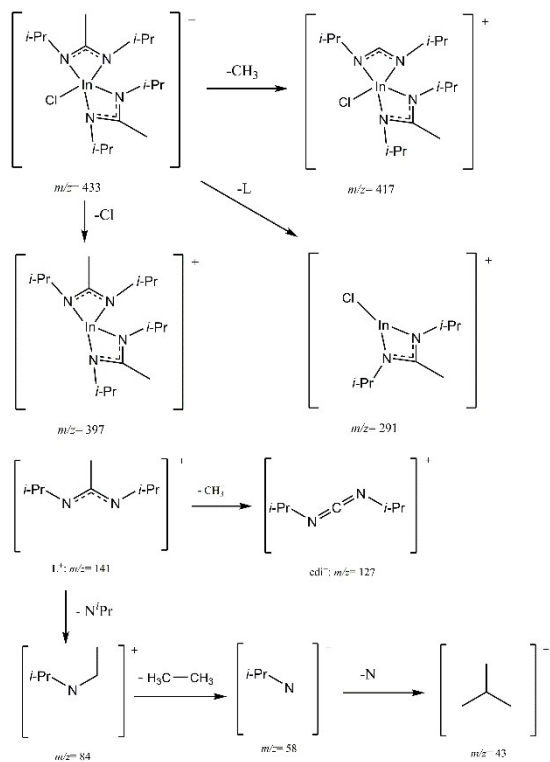

Scheme S1: Proposed fragmentation pattern for compound 1, [InCl(amd)<sub>2</sub>].

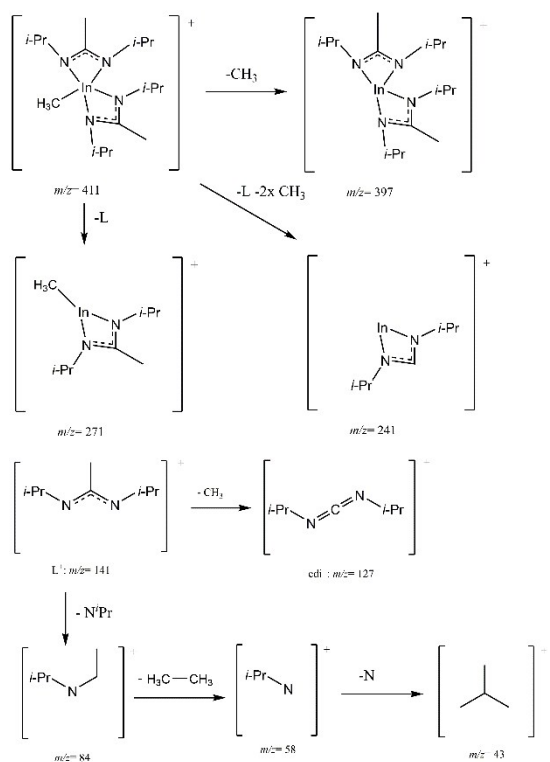

Scheme S2: Proposed fragmentation pattern for compound 2, [InMe(amd)<sub>2</sub>].

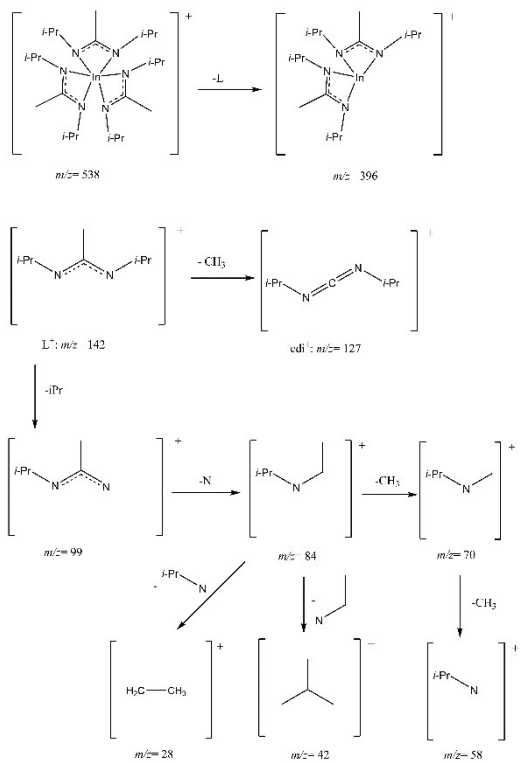

Scheme S 3: Proposed fragmentation pattern for compound **3**, [In(amd)<sub>3</sub>].

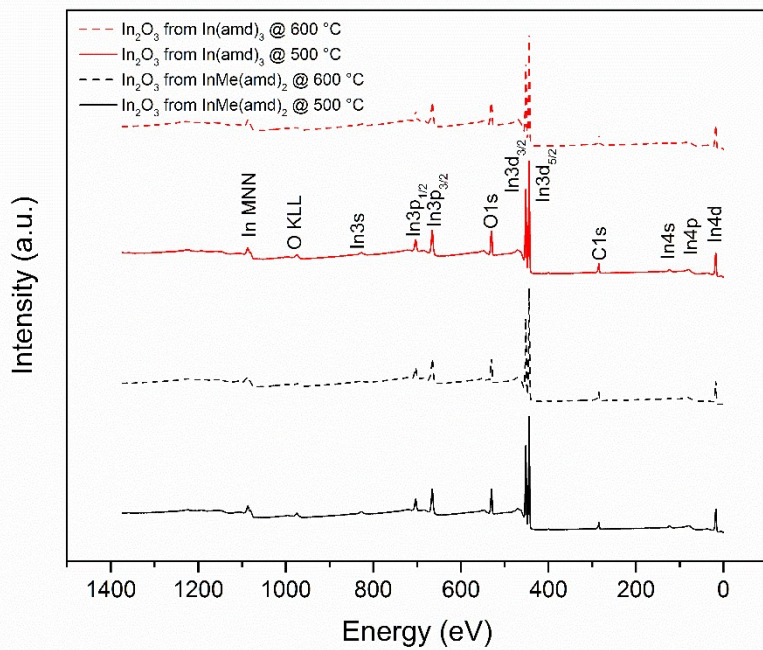

Figure S 2: XPS survey spectra (as received) of  $\text{In}_2\text{O}_3$  thin films deposited at different temperatures using precursor compounds **2** and **3**.

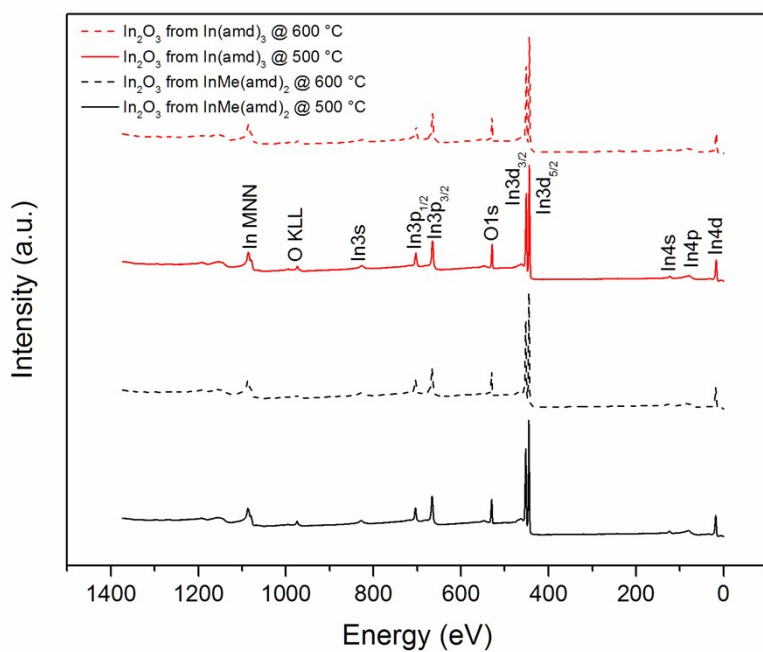

Figure S 3: XPS survey spectra after sputtering of  $\text{In}_2\text{O}_3$  thin films deposited at different temperatures using precursor compounds **2** and **3**.
